# Supplementary material for: Examination of Bidirectional Relationships Between Parent Stress and Two Types of Problem Behavior in Children with Autism Spectrum Disorder
Source: Springer Nature journal article supplement (doi:10.1007/s10803-014-2064-3), 2014-02-18

**Figure 3.**General Distress and child internalizing behavior model. (Key: T1 = Time 1, T2 = Time 2, T3 = Time 3, T4 = Time 4, PSI-SF = Parenting Stress Index-Short Form)


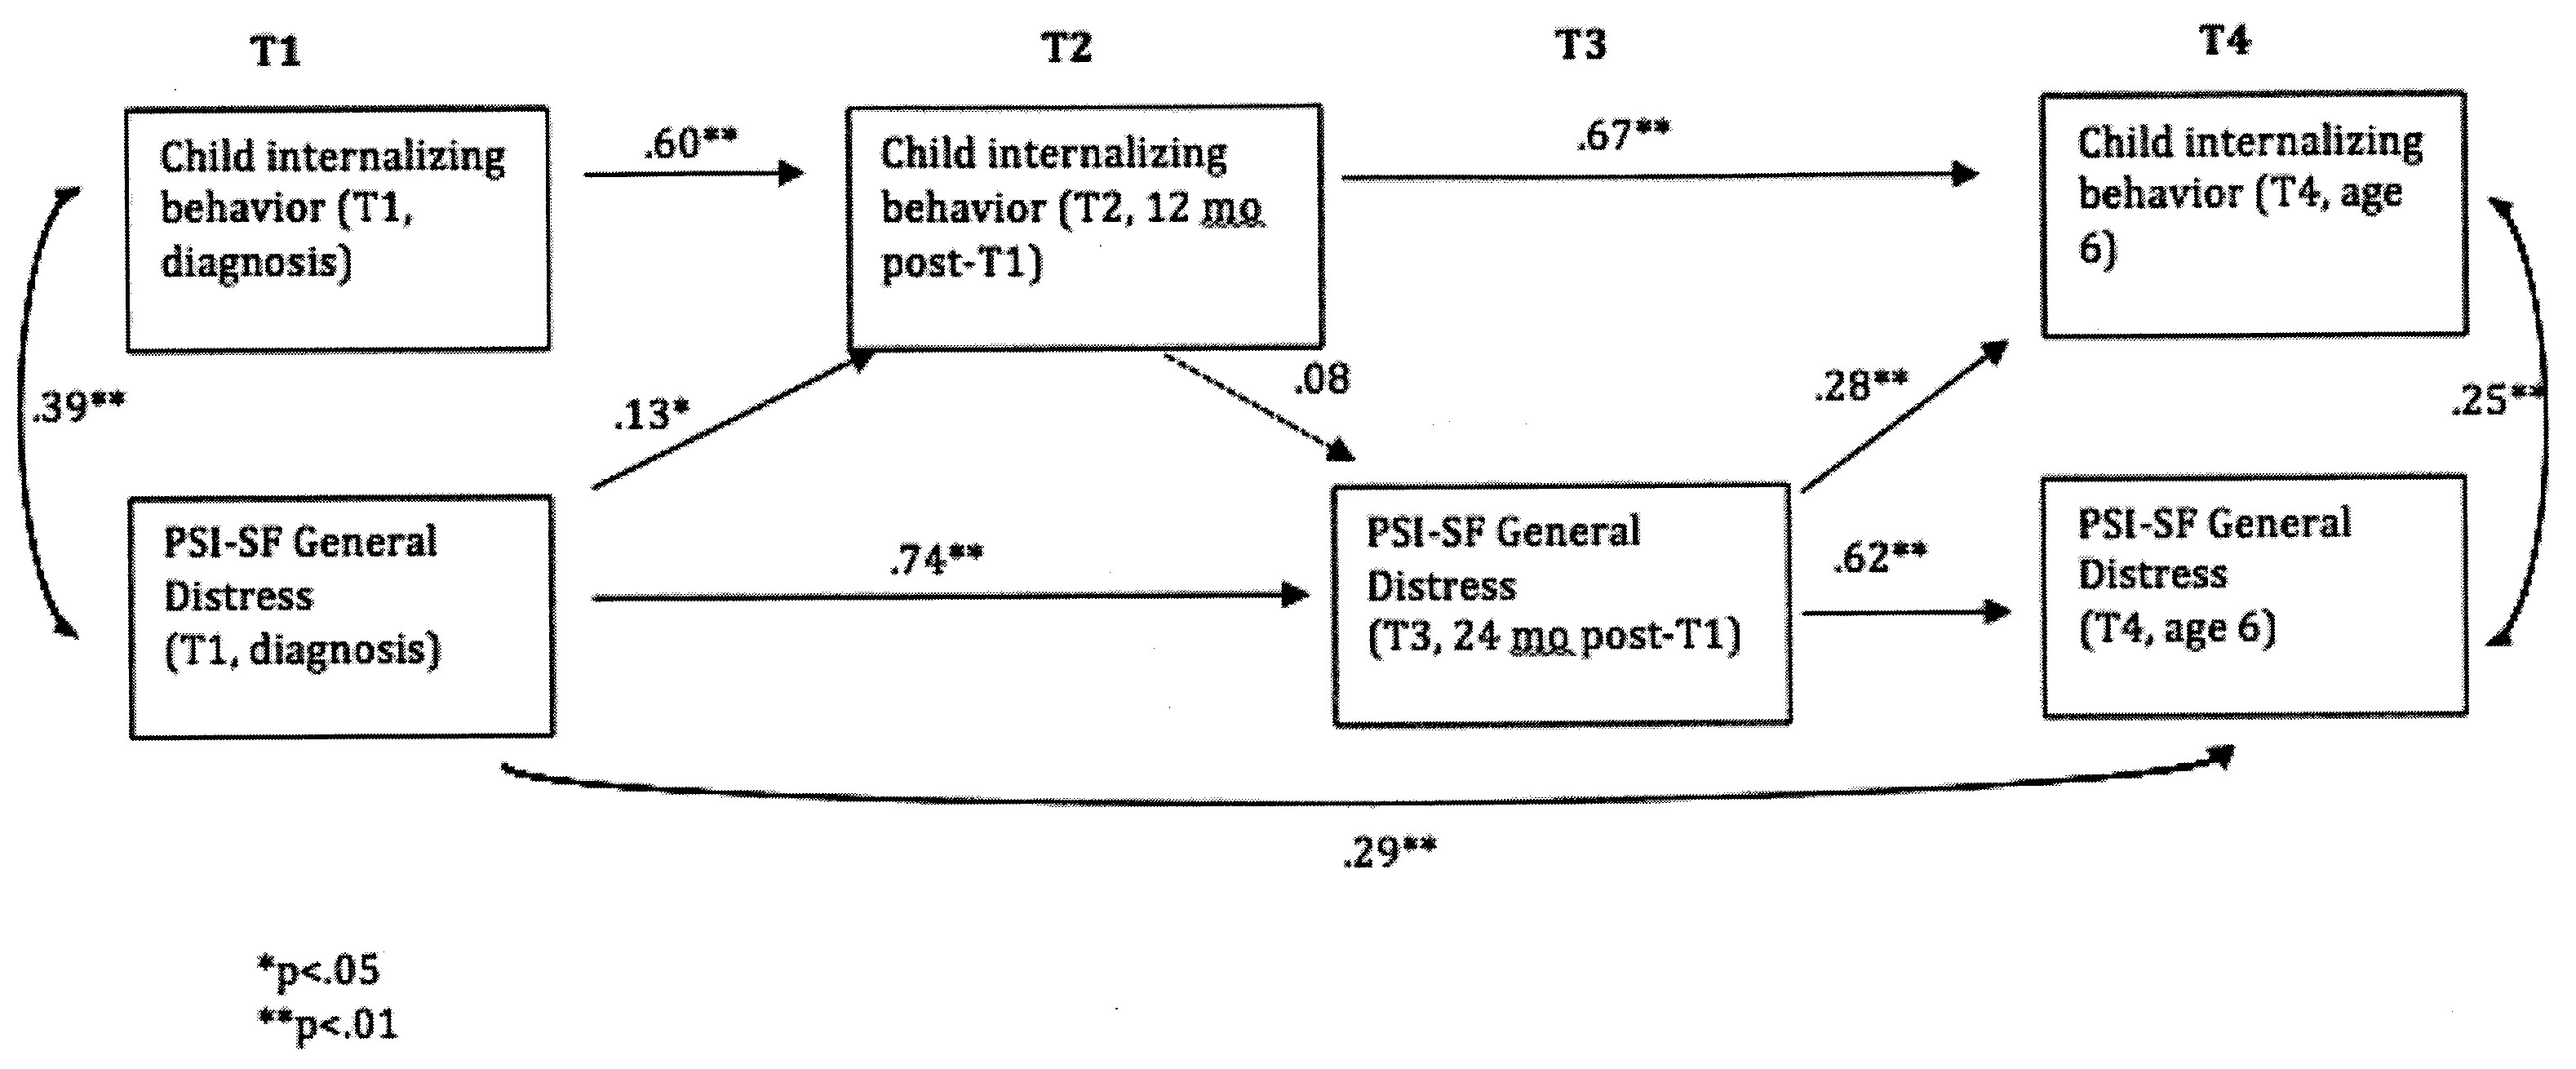

Supplement: MOESM1 [file 557890]
